# Supplementary material
Source: PubMed Central journal article supplement (PMC7884603)
Supplement: 15006_2021_9608_MOESM1_ESM.pdf [file 15006_2021_9608_MOESM1_ESM.pdf]

**Literatur**

1. Rebecca J. Stoltzfus Iron deficiency: Global prevalence and consequences. *Food and Nutrition Bulletin*, 2003, 24, no. 4 (supplement) ,
2. Kim J, Wessling-Resnick M. Iron and mechanisms of emotional behavior. *J Nutr Biochem*. 2014 Nov, 25(11):1101-7.
3. Steffen A, Thom J, Jacobi F, Holstiege J, Bätzing J. Trends in prevalence of depression in Germany between 2009 and 2017 based on nationwide ambulatory claims data. *J Affect Disord* 2020, 271: 239–247. DOI: 10.1016/j.jad.2020.03.082.
4. Ettman CK, Abdalla SM, Cohen GH et al. Prevalence of Depression Symptoms in US Adults Before and During the COVID-19 Pandemic. *JAMA Network Open*, 2020; 3 (9): e2019686 DOI: 10.1001/jamanetworkopen.2020.19686.
5. Roberts KM, Fitzpatrick PF. Mechanisms of Tryptophan and Tyrosine Hydroxylase. *IUBMB Life*. 2013 April ; 65(4): 350–357.
6. Hirschfeld RM. History and evolution of the monoamine hypothesis of depression. *J Clin Psychiatry*. 2000, 61 Suppl 6:4-6.
7. Levi S, Tiranti V. Neurodegeneration with Brain Iron Accumulation Disorders: Valuable Models Aimed at Understanding the Pathogenesis of Iron Deposition. *Pharmaceuticals* 2019, 12, 27; doi:10.3390/ph12010027.
8. Chen M-H, Su T-P, Chen Y-S et al. Association between psychiatric disorders and iron deficiency anemia among children and adolescents: a nationwide population-based study. *BMC Psychiatry* 2013 Jun 4;13:161-169.
9. Shafi M, Taufiq F, Mehmood H, Afsar S, Badar A. Relation between depressive disorder and Iron deficiency Anemia among adults reporting to a secondary healthcare facility: a hospital-based case control study. *J Coll Physicians Surg Pak*. 2018;28(6):456–559.
10. Hidese S, Saito K, Asano S, Kunugi H. Association between iron-deficiency anemia and depression: a web-based Japanese investigation. *Psychiatry Clin Neurosci*. 2018, 72(7):513–21.
11. König P , Jimenez K, Saletu-Zyhlarz G et al. Iron deficiency, depression, and fatigue in inflammatory bowel diseases. *Z Gastroenterol* 2020 Dec;58(12):1191-1200.
12. Azami M, Badfar G, Khalighi Z et al. The association between anemia and postpartum depression: A systematic review and meta-analysis. *Caspian J Intern Med*. 2019 Spring, 10(2): 115–124.
13. Sheikh M, Hantoushzadeh S, Shariat M. The efficacy of early iron supplementation on postpartum depression, a randomized double-blind placebo-controlled trial. *Eur J Nutr* 2017, 56(2):901-908.
14. Verdon F, Burnand B, Fallab Stubi C-L. et al. Iron supplementation for unexplained fatigue in non-anaemic women: double blind randomised placebo controlled trial. *BMJ*. 2003, 326:1124–1128.
